# Supplementary material for: Psychometric Evaluation of the Drive for Muscularity Scale and the Muscle Dysmorphic Disorder Inventory among Brazilian Cisgender Gay and Bisexual Adult Men
Source: MDPI journal article supplement (doi:10.3390/ijerph20020989), 2023-01-05

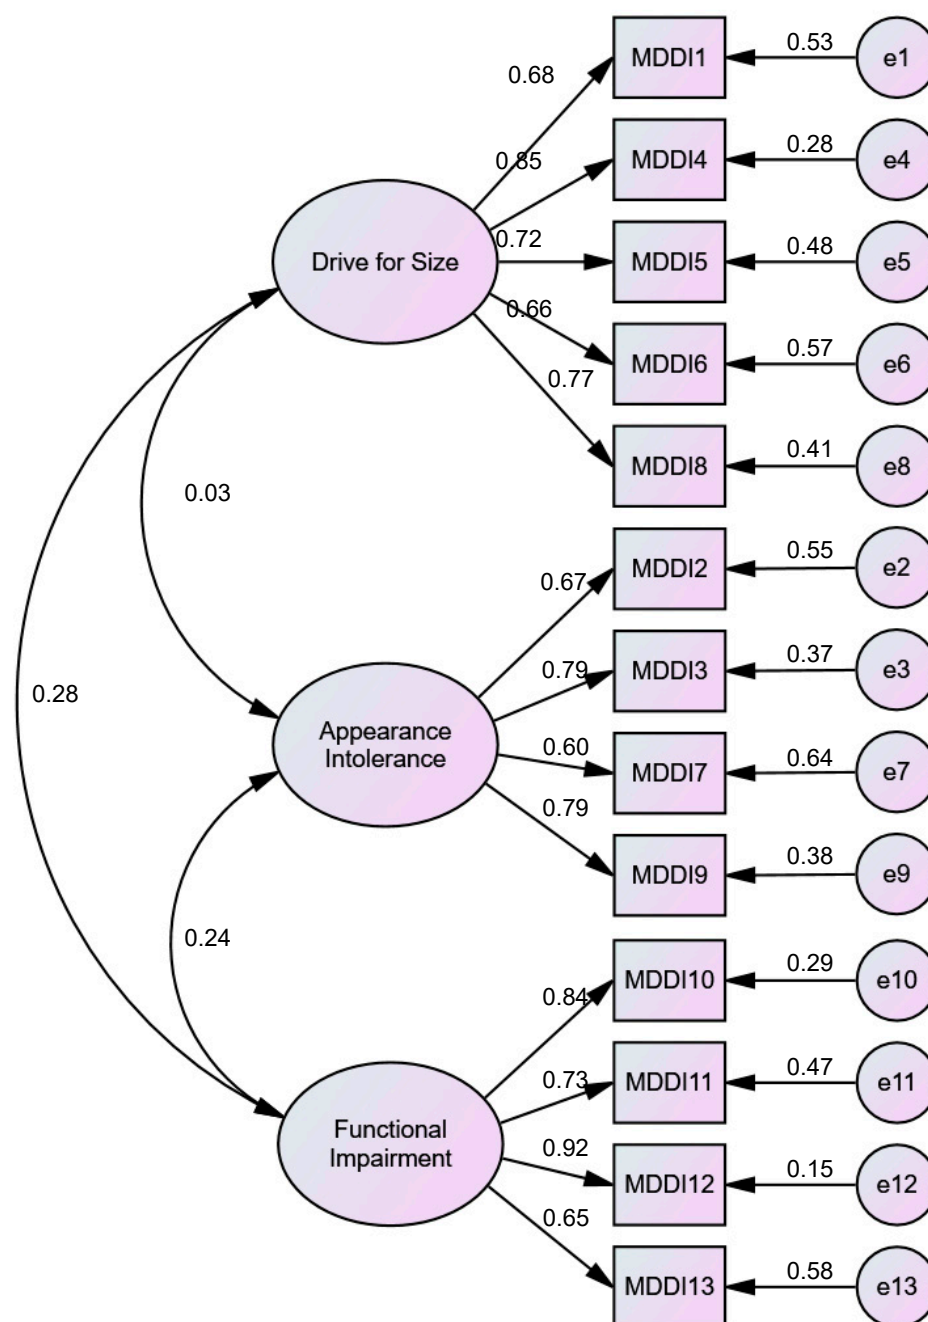

**Figure S1.** Confirmatory factor analysis results (standardized factor loading and residuals) of the Muscle Dysmorphic Disorder Inventory (MDDI) for Brazilian cisgender gay and bisexual adult men.

**Figure S2.** Confirmatory factor analysis results (standardized factor loading and residuals) of the Drive for Muscularity Scale (DMS) for Brazilian cisgender gay and bisexual adult men.

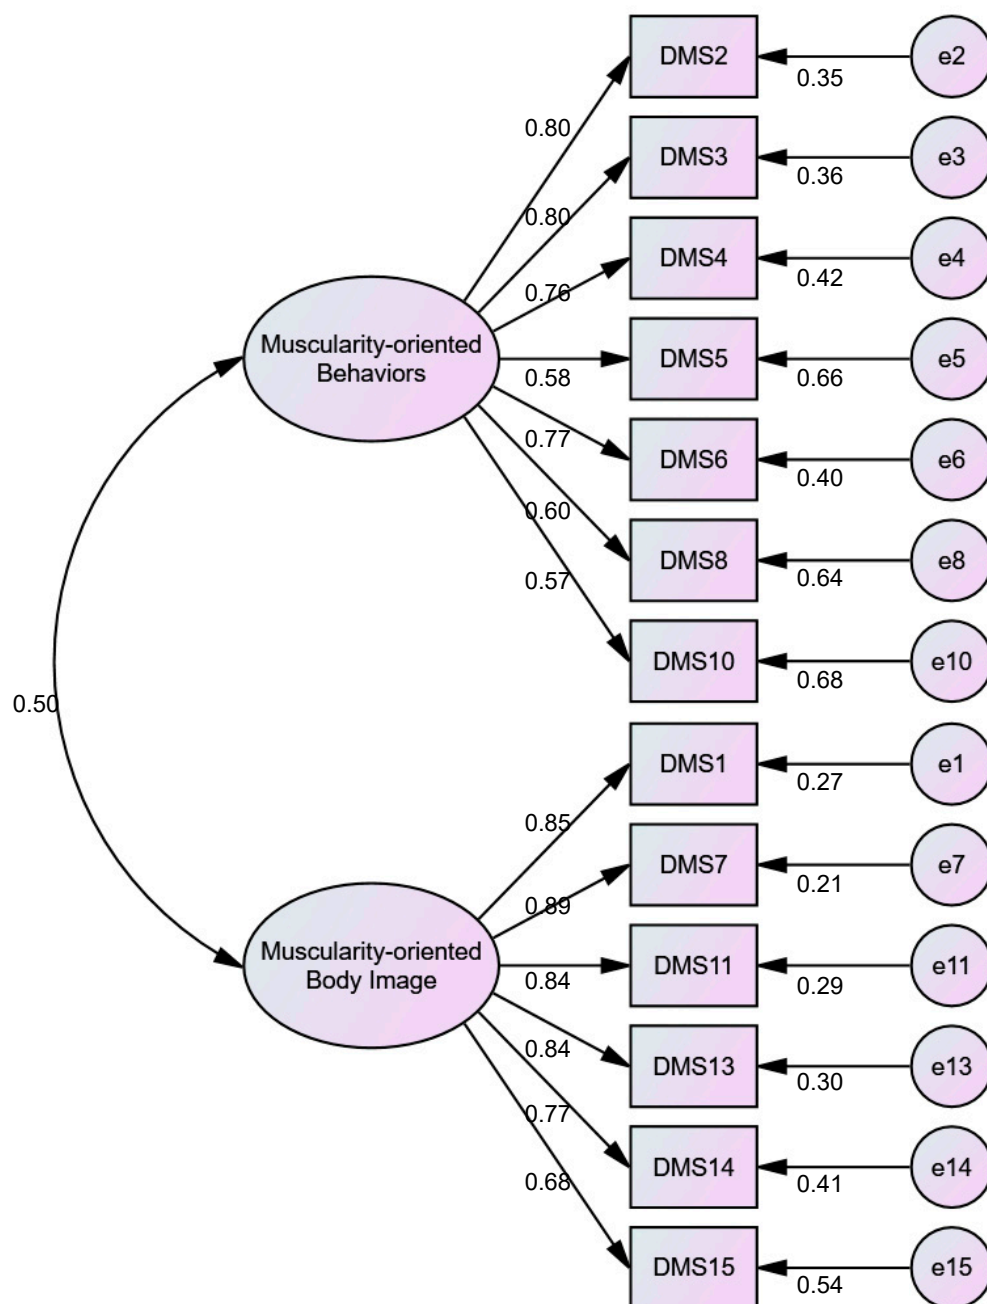

Supplement: s1 [file s1]
